# Supplementary material
Source: publisher figshare collection journal article supplement (https://karger.figshare.com/ndownloader/files/25736753)
Supplement: Supplementary file 1 [file 25736753]

**Supplementary Table S1.** Quality assessment of the included observational studies by Newcastle Ottawa scale

| **Author, Year** | **Selection** | | | |  | **Comparability** | |  | **Outcome** | | | **Total Score** |
| --- | --- | --- | --- | --- | --- | --- | --- | --- | --- | --- | --- | --- |
| 1 | 2 | 3 | 4 |  | 5A | 5B |  | 6 | 7 | 8 |
| Exposed cohort truly/somewhat representative | Nonexposed cohort drawn from the same community | Ascertainment of exposure | Outcome of interest not present at start |  | Cohorts adjusted for age | Cohorts adjusted for other important factor(s) |  | Quality of outcome assessment | Follow-up/  Observation period  Long enough for outcomes to occur | Adequacy of follow-up of cohorts |
| Cao J et al. 2020 | * |  | * | * |  |  |  |  | * | * | * | 6 |
| Chen et al. 2020 | * |  | * | * |  |  |  |  | * | * | * | 6 |
| Chen T et al. 2020 | * |  | * | * |  |  |  |  | * | * | * | 6 |
| Deng Y et al. 2020 | * | * | * | * |  |  | * |  | * | * | * | 8 |
| Du RH et al. 2020 | * | * | * | * |  |  |  |  | * | * |  | 6 |
| Feng Z et al. 2020 | * |  | * | * |  |  |  |  | * | * | * | 6 |
| Grasselli G et al. 2020 | * | * | * | * |  |  |  |  | * | * | * | 7 |
| Hu H et al. 2020 | * | * | * | * |  |  |  |  | * | * |  | 6 |
| Mehra et al. 2020 | * |  | * | * |  | * | * |  | * | * | * | 8 |
| Palaiodimos L et al. 2020 | * |  | * | * |  | * | * |  | * | * | * | 8 |
| Richardson S et al. 2020 | * |  | * | * |  |  | * |  | * | * |  | 6 |
| Shi S et al. 2020 | * |  | * | * |  | * | * |  | * | * |  | 7 |
| Shi Q et al. 2020 | * | * | * | * |  |  |  |  | * | * |  | 6 |
| Sun H et al. 2020 | * | * | * | * |  |  | * |  | * | * |  | 7 |
| Tian S et al. 2020 | * |  | * | * |  |  |  |  | * | * | * | 6 |
| Wang L et al. 2020 | * | * | * | * |  |  |  |  | * | * |  | 6 |
| Wu C et al. 2020 | * |  | * | * |  | * | * |  | * | * | * | 8 |
| Yan Y et al. 2020 | * | * | * | * |  |  |  |  | * | * |  | 6 |
| Yao Q et al. 2020 | * | * | * | * |  |  |  |  | * | * |  | 6 |
| Zhou F et al. 2020 | * | * | * | * |  |  |  |  | * | * |  | 6 |

In this scale score ranges between 0-9 where “0-3” indicates low quality, “4-5” indicates moderate quality and score of ≥6 indicates high quality study.
